# Supplementary material for: GIPR Overexpression Reduces the Tumorigenic Potential of Retinoblastoma Cells
Source: Preprints.org preprint supplement (doi:10.20944/preprints202403.1455.v1), 2024-03-25
Supplement: Supplementary file 1 [file supplementary]

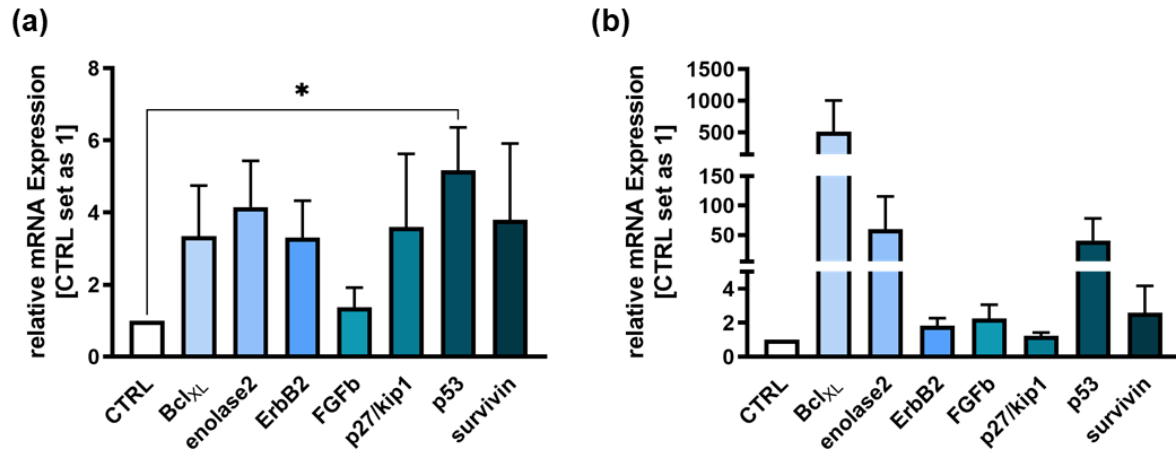

**Figure S1.** Verification of human oncology array data via Real-Time PCR. Potential GIPR pathway downstream signaling molecules found to be upregulated on protein level upon GIPR overexpression were likewise upregulated on mRNA level in WERI (a) and Y79 RB cells (b). white bar: CTRL= cells transduced with control vector. Colored bars: GIPR overexpressing cells. Values represent means  $\pm$  SEM; not significant p-values are not shown. \* $p < 0.05$

**Table S1.** Significantly enriched GO-terms of genes differentially expressed after GIPR overexpression in Weri RB cells. count: gene numbers enriched in a specific GO-term.

| GO-term                                                   | count | p-value   |
|-----------------------------------------------------------|-------|-----------|
| GO:0043066~negative regulation of apoptotic process       | 5     | 0.0000084 |
| GO:0008284~positive regulation of cell proliferation      | 5     | 0.0000087 |
| GO:0001934~positive regulation of protein phosphorylation | 4     | 0.00003   |
| GO:0051726~regulation of cell cycle                       | 4     | 0.00005   |
| GO:0042981~regulation of apoptotic process                | 3     | 0.0023    |
| GO:0009410~response to xenobiotic stimulus                | 3     | 0.0029    |
| GO:0008285~negative regulation of cell proliferation      | 3     | 0.0079    |
| GO:0010628~positive regulation of gene expression         | 3     | 0.0099    |
| GO:0045892~negative regulation of transcription           | 3     | 0.0127    |
| GO:0006915~apoptotic process                              | 3     | 0.0139    |

**Table S2.** Significantly enriched KEGG-pathways of genes differentially expressed after GIPR overexpression in Weri RB cells. count: gene numbers enriched in a specific GO-term.

| KEGG-pathway                                       | count | p-value   |
|----------------------------------------------------|-------|-----------|
| hsa05200:pathways in cancer                        | 6     | 0.0000005 |
| platinum drug resistance                           | 4     | 0.000011  |
| hsa04151:PI3K-Akt signaling pathway                | 5     | 0.000041  |
| hsa05226:gastric cancer                            | 4     | 0.000096  |
| hsa05212:pancreatic cancer                         | 3     | 0.0012    |
| hsa05220:chronic myeloid leukemia                  | 3     | 0.0012    |
| hsa01521:EGFR tyrosine kinase inhibitor resistance | 3     | 0.0012    |
| hsa05222:small cell lung cancer                    | 3     | 0.0016    |
| hsa05215:prostate cancer                           | 3     | 0.0018    |
| hsa01522:endocrine resistance                      | 3     | 0.0018    |
| hsa04066:HIF-1 signaling pathway                   | 3     | 0.0022    |
| hsa04210:apoptosis                                 | 3     | 0.0035    |
| hsa05162:measles                                   | 3     | 0.0036    |
| hsa05224:breast cancer                             | 3     | 0.0041    |
| hsa05202:transcriptional misregulation in cancer 3 | 3     | 0.0070    |
| hsa05205:proteoglycans in cancer                   | 3     | 0.0078    |
| hsa04010:MAPK signaling pathway                    | 3     | 0.0165    |
| hsa05206:microRNAs in cancer                       | 3     | 0.0174    |
